# Supplementary material for: OES-Fed: a federated learning framework in vehicular network based on noise data filtering
Source: PeerJ journal article supplement (doi:10.7717/peerj-cs.1101), 2022-09-20
Supplement: 3-Figures.pdf [file 3-Figures.pdf]

```
In [1]: import matplotlib.pyplot as plt
import seaborn as sns
import numpy as np
```

```
In [2]: x = [1, 2, 3, 4, 5, 6, 7, 8, 9, 10, 11, 12, 13, 14, 15, 16, 17, 18, 19, 20, 21, 22, 23, 24, 25, 26, 27, 28, 29, 30]
lqd_c = [32., 35., 29., 30., 30., 25., 30., 29., 28., 25., 26., 27., 29., 27., 23., 34.
lb_c = [32, 35, 29, 27., 28., 20., 27., 24., 22., 22., 22., 21., 23., 22., 18., 31., 2
lqd_m = [26., 29., 29., 31., 31., 27., 31., 36., 36., 39., 33., 36., 35., 37., 37., 36.
lb_m = [26., 29, 29, 29., 31., 27., 31., 36., 35., 38., 31., 35., 35., 34., 35., 34., 3
```

```
In [3]: c1 = []
c2 = []
for i in lb_m:
    c1.append(i-8)
for i in lqd_m:
    c2.append(i-8)
```

```
In [4]: c3 = []
c4 = []
for i in lb_c:
    c3.append(i-8)
for i in lqd_c:
    c4.append(i-8)
```

```
In [14]: plt.subplot(1, 2, 1)
plt.axhline(y=32, ls=":", c="black")
plt.plot(x, c2, color='black', label='Current Perspective \n of Nosie Data_MNIST', ls=
plt.plot(x, c1, color='red', label='Historical Perspective \n of Noise Data_MNIST', l
plt.fill_between(x, c1, color='red', alpha=0.7)
plt.xlabel(' rounds')
plt.ylabel(' clients')
plt.legend(prop = {'size':9.5})

plt.subplot(1, 2, 2)
plt.axhline(y=32, ls=":", c="black")
plt.plot(x, c4, color='black', label='Current Perspective \n of Nosie Data_CIFAR', ls=
plt.plot(x, c3, color='red', label='Historical Perspective \n of Noise Data_CIFAR', l
plt.fill_between(x, c3, color='red', alpha=0.7)
plt.xlabel(' rounds')
plt.legend(prop = {'size':9.5})

plt.savefig("clients.pdf")
```

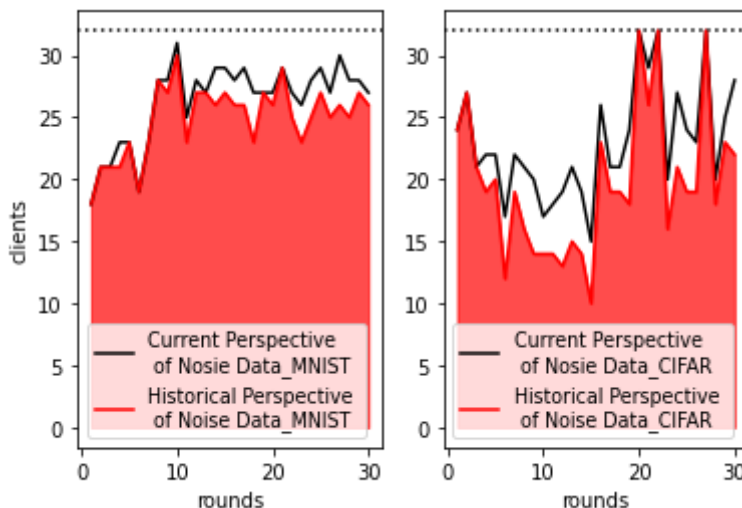

```
In [6]: acc_avg = [90.7300, 93.4800, 93.9600, 95.3300, 95.6500, 95.5500, 96.2100, 95.9500, 96.0
acc_sgd = [10.2300, 10.4700, 10.9200, 11.5800, 12.4400, 13.4300, 14.7800, 16.3200, 17.9
```

```

acc_our = [90.3500, 93.7400, 95.5100, 96.4100, 96.9300, 97.2500, 97.4700, 97.6800, 97.7
acc_cavg = [21.7500, 21.1200, 20.4700, 20.3100, 20.5300, 20.2400, 20.5400, 20.1900, 20.
acc_csgd = [11.7000, 11.7800, 11.8600, 12.0400, 12.1600, 12.2100, 12.2900, 12.3800, 12.
acc_cour = [21.7000, 29.3100, 33.6300, 36.6700, 40.2200, 42.5800, 43.5300, 45.8200, 46.

loss_avg = [0.8014, 0.6091, 0.3872, 0.4697, 0.3499, 0.4341, 0.5339, 0.5922, 0.5284, 0.
loss_sgd = [2.3083, 2.3038, 2.2993, 2.2949, 2.2906, 2.2863, 2.2821, 2.2779, 2.2737, 2.
loss_our = [1.0756, 0.5777, 0.4733, 0.3715, 0.3536, 0.2613, 0.2426, 0.1595, 0.2036, 0.1

loss_cavg = [2.2725, 2.2638, 2.2599, 2.2555, 2.2507, 2.2466, 2.2442, 2.2432, 2.2424, 2.
loss_csgd = [2.3022, 2.3020, 2.3018, 2.3015, 2.3013, 2.3011, 2.3009, 2.3006, 2.3004, 2.
loss_cour = [2.2724, 2.2161, 2.1783, 2.1476, 2.1239, 2.1037, 2.0891, 2.0763, 2.0648, 2.

```

```
In [3]: 61.7500-19.7300
```

```
Out[3]: 42.019999999999996
```

```
In [20... print(np.mean(acc_avg), np.mean(acc_sgd), np.mean(acc_our))
```

```
95.90066666666667 28.597333333333333 97.68666666666665
```

```
In [20... print(np.mean(acc_cavg), np.mean(acc_csgd), np.mean(acc_cour))
```

```
20.216666666666665 13.051666666666668 50.299666666666674
```

```
In [20... print(np.mean(loss_avg), np.mean(loss_sgd), np.mean(loss_our))
```

```
0.4388666666666667 2.2454733333333334 0.21354333333333334
```

```
In [20... print(np.mean(loss_cavg), np.mean(loss_csgd), np.mean(loss_cour))
```

```
2.2443533333333336 2.2989200000000003 2.0055816666666667
```

```
In [15... f, (ax, ax2) = plt.subplots(2, 1, sharex=True)
ax.set_ylim(90, 100) # outliers only
ax2.set_ylim(10, 60)
ax.plot(acc_our, color='red', marker='D', label='OES-Fed in MNIST', ls='-')
ax.plot(acc_avg, color='black', marker='x', label='FedAVG in MNIST', ls='-')
ax2.plot(acc_sgd, color='purple', marker='x', label='FedSGD in MNIST', ls='-')
ax.spines['bottom'].set_visible(False)
ax2.spines['top'].set_visible(False)
plt.ylabel('accuracy')
plt.xlabel('rounds')
ax.legend()
ax2.legend(loc=4)
plt.savefig("accm.pdf")
```

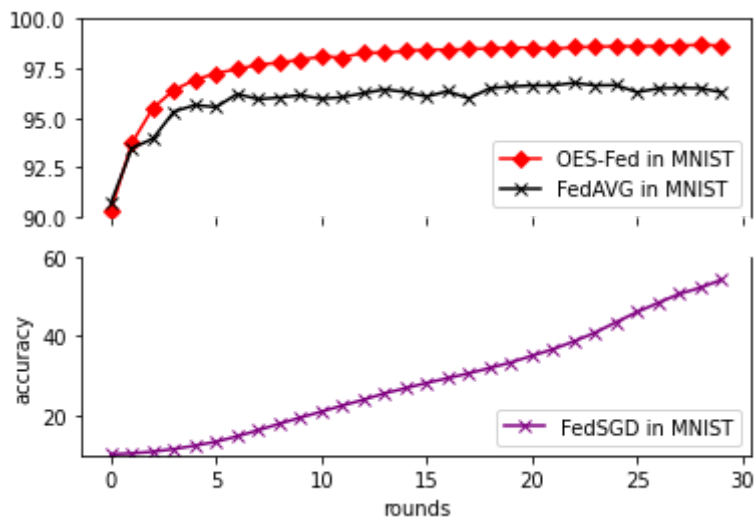

```
In [16... plt.plot(x, acc_cour, color='red',marker='D', label='OES-Fed in CIFAR',ls='-')
plt.plot(x, acc_cavg, color='black',marker='x', label='FedAVG in CIFAR',ls='-')
plt.plot(x, acc_csgd, color='purple', marker='x', label='FedSGD in CIFAR',ls='-')
plt.xlabel('rounds')
plt.legend(loc=7)
plt.savefig("acc.pdf")
```

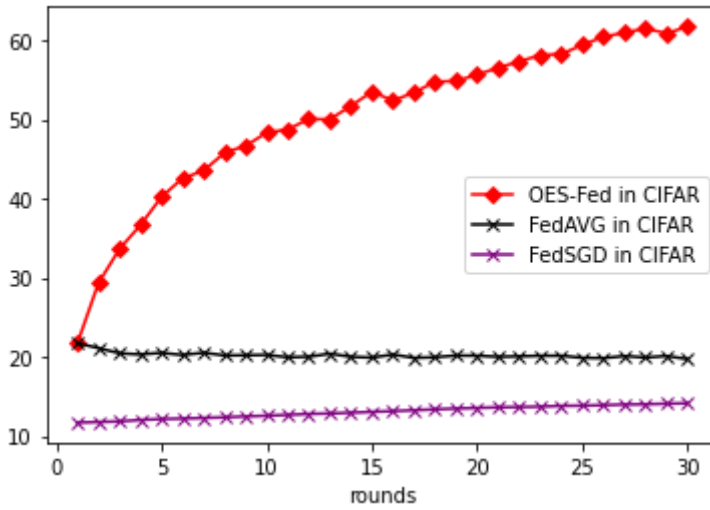

```
In [16... plt.plot(x, loss_our, color='red',marker='D', label='OES-Fed in MNIST',ls='-')
plt.plot(x, loss_avg, color='black',marker='x', label='FedAVG in MNIST',ls='-')
plt.plot(x, loss_sgd, color='purple',marker='x', label='FedSGD in MNIST',ls='-')
plt.ylabel('loss')
plt.xlabel('rounds')
plt.legend(loc=7)
plt.savefig("lossm.pdf")
```

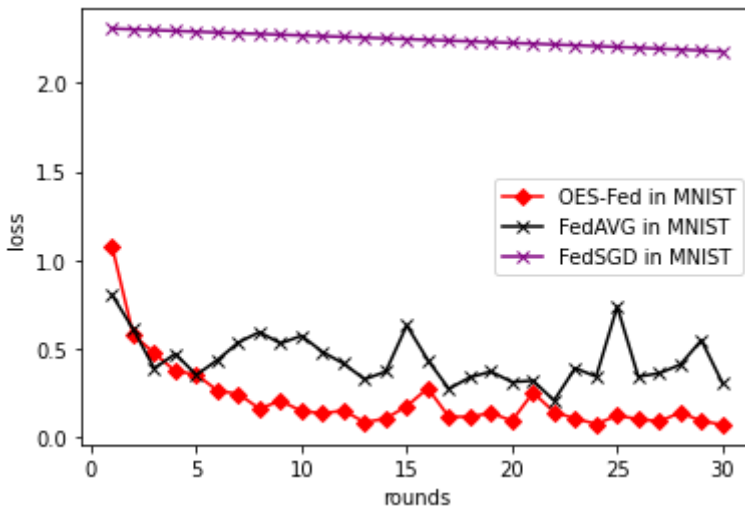

```
In [16... plt.plot(x, loss_cour, color='red',marker='D', label='OES-Fed in CIFAR',ls='-')
plt.plot(x, loss_cavg, color='black',marker='x', label='FedAVG in CIFAR',ls='-')
plt.plot(x, loss_csgd, color='purple',marker='x', label='FedSGD in CIFAR',ls='-')
plt.ylabel('loss')
plt.xlabel('rounds')
plt.legend(loc=7)
plt.savefig("loss.pdf")
```



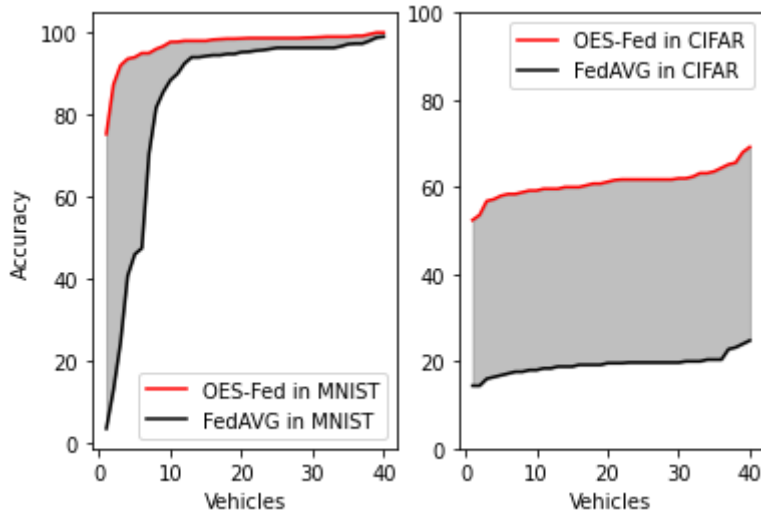

```
In [ ]: plt.bar(num, c, label='graph 1')
plt.plot(num, a, color='red', label='CIFAR', ls='-')
plt.xlabel('clients')
plt.ylabel('rounds')
```

```
In [33]: from mpl_toolkits.axes_grid1 import host_subplot
import mpl_toolkits.axisartist as AA
```

```
In [30]: acc = [98.66, 96, 98.5, 95, 92, 98.66, 98.66, 98.66, 94, 97.75, 98.66, 95, 98.66, 75.25, 87.3333, 98.
```

```
In [11... plt.figure(dpi=250, figsize=(35, 8))
host = host_subplot(111, axes_class=AA.Axes)
plt.subplots_adjust(right=0.75)
par2 = host.twinx()
offset = 0
new_fixed_axis = par2.get_grid_helper().new_fixed_axis
par2.axis["right"] = new_fixed_axis(loc="right",
    axes=par2,
    offset=(offset, 0))
par2.axis["right"].toggle(all=True)
host.set_xlim(1, 40)
host.set_ylim(0, 500)
p3, = par2.plot(num, acc, label="Accuracy for each vehicle in MNIST", color='red', mark
par2.set_ylim(50, 100)
par2.axis["right"].label.set_color(p3.get_color())
plt.bar(num, m, label='Total rounds for each vehicle in MNIST')
plt.axhline(y=240, ls=":", c="black")
plt.xlabel('Vehicle number')
plt.ylabel('Total rounds')
par2.set_ylabel('Accuracy')

plt.legend(fontsize='xx-large', bbox_to_anchor=(1.05, 0), loc=3, borderaxespad=0)

plt.savefig("lc.pdf")
```

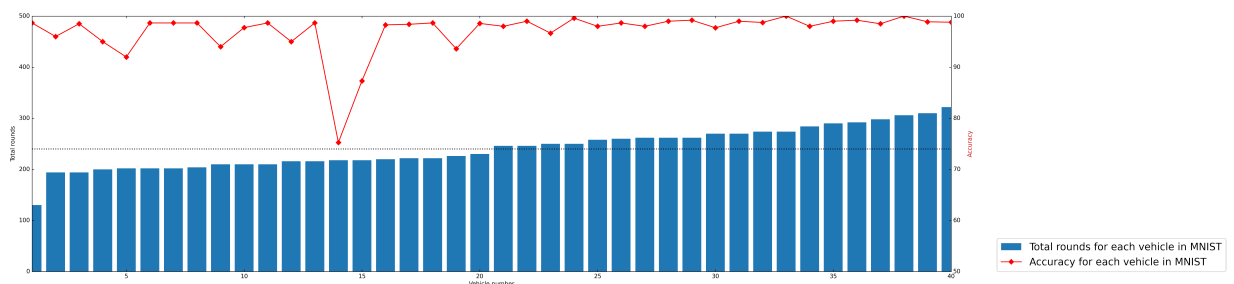

```
In [10... ac_c = [61.75, 58.8, 61.75, 59.2, 62, 56.8, 59.6, 58.4, 63.6, 60, 61.2, 53.6, 58.4, 65.6, 60.8, 59.2,
```

```

In [11]: plt.figure(dpi=250,figsize=(35,8))
host = host_subplot(111, axes_class=AA.Axes)
plt.subplots_adjust(right=0.75)
par2 = host.twinx()
offset = 0
new_fixed_axis = par2.get_grid_helper().new_fixed_axis
par2.axis["right"] = new_fixed_axis(loc="right",
    axes=par2,
    offset=(offset, 0))
par2.axis["right"].toggle(all=True)
host.set_xlim(1, 40)
host.set_ylim(0, 500)
p3, = par2.plot(num, ac_c, label="Accuracy for each vehicle in CIFAR",color='red',mar
par2.set_ylim(30, 100)
par2.axis["right"].label.set_color(p3.get_color())
plt.bar(num, c, label='Total rounds for each vehicle in CIFAR')
plt.axhline(y=240,ls=":",c="black")
plt.xlabel('Vehicle number')
plt.ylabel('Total rounds')
par2.set_ylabel('Accuracy')

plt.legend(fontsize='xx-large',bbox_to_anchor=(1.05, 0), loc=3, borderaxespad=0)

plt.savefig("lcc.pdf")

```

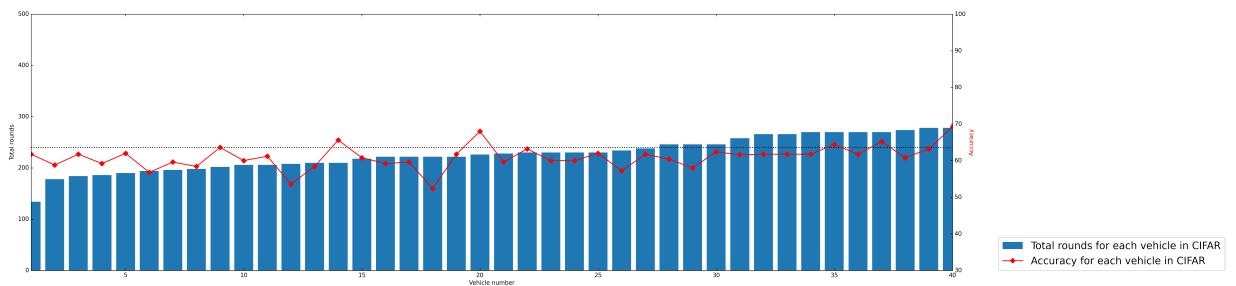

```

In [2]: from sklearn import metrics
import matplotlib.pyplot as plt

```

```

In [3]: a1 = ([0.          , 0.14212329, 0.19520548, 0.34075342, 0.40582192, 0.52568493, 0.655821
a2 = ([0.          , 0.04807692, 0.16826923, 0.23317308, 0.35336538, 0.40144231, 0.473557
b1 = ([0.          , 0.06666667, 0.86453293, 0.86453293, 0.93333333, 1.          ])
b2 = ([0.          , 0.03807692, 0.64057692, 0.64057692, 0.67836538, 1.          ])
c1 = ([0.          , 0.07692308, 0.68461538, 0.84615385, 0.95615385, 1.          ])
c2 = ([0.          , 0.02574386, 0.15469873, 0.25432891, 0.35582192, 1.          ])

```

```

In [4]: auc1 = metrics.auc(a2, a1)
auc2 = metrics.auc(b2, b1)
auc3 = metrics.auc(c2, c1)

```

```

In [5]: d1 = ([0.          , 0.109, 0.213, 0.31, 0.413, 0.515, 0.621, 0.726, 0.824, 0.907, 1.          ])
d2 = ([0.          , 0.04807692, 0.16826923, 0.23317308, 0.35336538, 0.40144231, 0.473557
e1 = ([0.          , 0.06666667, 0.13333333, 0.33333333, 0.33333333, 0.46666667, 0.733333
e2 = ([0.          , 0.16826923, 0.23547318, 0.25438736, 0.31257489, 0.33294875, 0.489562
f1 = ([0.          , 0.23076923, 0.38461538, 0.69230769, 0.76923077, 0.79615385, 0.884726
f2 = ([0.          , 0.16826923, 0.23317308, 0.31467528, 0.33492785, 0.33627589, 0.362587

```

```

In [6]: auc4 = metrics.auc(d2, d1)
auc5 = metrics.auc(e2, e1)
auc6 = metrics.auc(f2, f1)

```

```

In [9]: plt.figure()
lw = 2

```

```

plt.plot(a1, a2, color='purple',marker='x',lw=lw, label='FedSGD auc = %0.2f' % auc1)
plt.plot(b1, b2, color='black',marker='x',lw=lw, label='FedAVG auc = %0.2f' % auc2)
plt.plot(c1, c2, color='red',marker='D',lw=lw, label='OES-Fed auc = %0.2f' % auc3)
plt.plot([0, 1], [0, 1], color='navy', lw=lw, linestyle='--')
plt.xlim([0.0, 1.0])
plt.ylim([0.0, 1.05])
plt.xlabel('False Positive Rate')
plt.ylabel('True Positive Rate')
plt.title('Receiver operating characteristic example(MNIST)')
plt.legend(loc="upper left")

plt.savefig("11.pdf")
plt.show()

```

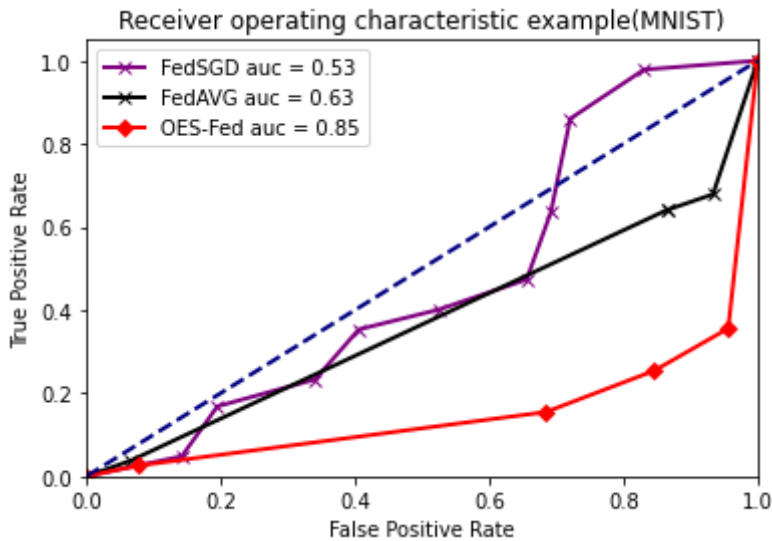

```

In [12]: plt.figure()
lw = 2

plt.plot(d1, d2, color='purple',marker='x',lw=lw, label='FedSGD auc = %0.2f' % auc4)
plt.plot(e1, e2, color='black',marker='x',lw=lw, label='FedAVG auc = %0.2f' % auc5)
plt.plot(f1, f2, color='red',marker='D',lw=lw, label='OES-Fed auc = %0.2f' % auc6)
plt.plot([0, 1], [0, 1], color='navy', lw=lw, linestyle='--')
plt.xlim([0.0, 1.0])
plt.ylim([0.0, 1.05])
plt.xlabel('False Positive Rate')
plt.ylabel('True Positive Rate')
plt.title('Receiver operating characteristic example(CIFAR-10)')
plt.legend(loc="upper left")

plt.savefig("22.pdf")
plt.show()

```

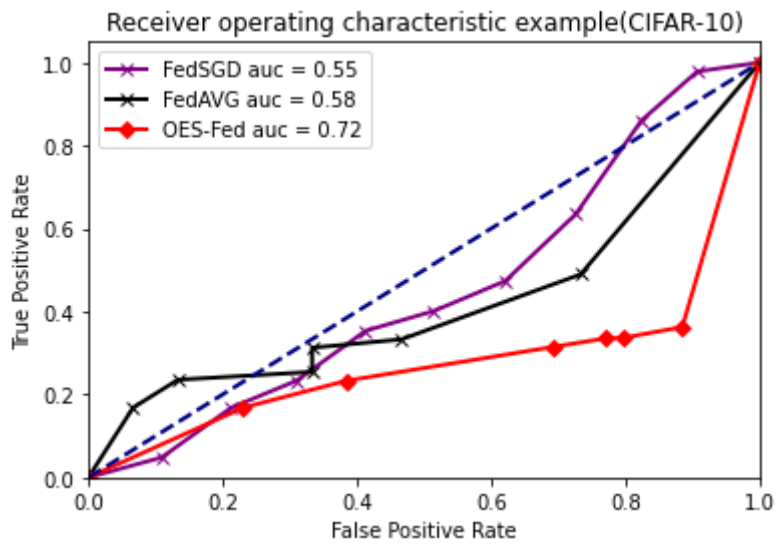

In [ ]:
